# Supplementary material for: The low complexity motif of cytoplasmic polyadenylation element binding protein 3 (CPEB3) is critical for the trafficking of its targets in neurons
Source: bioRxiv or medRxiv preprint supplement (doi:10.1101/2020.05.16.100032), 2020-05-17
Supplement: Supplementary file [file media-2.pdf]

Supplementary Table 1. Detailed Strings data.

| <u>Protein ID</u> | <u>A color code</u> | <u>B color code</u>    |
|-------------------|---------------------|------------------------|
| Magohb            | red                 | blue                   |
| Ktn1              | red                 |                        |
| Bzw1              | red                 |                        |
| Tardbp            | red                 |                        |
| Clasp1            | blue                | green                  |
| Naa15             | red                 |                        |
| Atp6v1h           | red                 |                        |
| Cnn3              | red                 | green                  |
| Fxr1              | red                 | green, blue            |
| Eif4e             | yellow              | cyan, green, blue, red |
| Ubap2l            | red                 |                        |
| Ctbp1             | red                 |                        |
| Lrp1              | red                 |                        |
| Cyfip1            | red                 |                        |
| Cpne2             | red                 |                        |
| Dbn1              | red                 |                        |
| Tmem33            | cyan                |                        |
| Etfb              | red                 |                        |
| Atxn2l            | red                 | cyan, blue, green      |
| Tjp1              | red                 | green                  |
| Rpl18a            | yellow              | yellow, green, blue    |
| Tln2              | red                 | green                  |

|          |        |                     |
|----------|--------|---------------------|
| Rps25    | yellow | yellow, green, blue |
| Idh3a    | cyan   |                     |
| Chordc1  | red    |                     |
| Rps12    | yellow | yellow, green, blue |
| Atp2b1   | red    | green               |
| Psm6     | green  |                     |
| Anxa7    | red    |                     |
| Actn1    | red    | green               |
| Gatad2b  | red    |                     |
| Kpna2    | red    | cyan, blue, green   |
| Sept9    | red    | green               |
| Eif3m    | yellow |                     |
| Srp68    | yellow | green, blue         |
| Rpn2     | cyan   |                     |
| Eif4a3   | yellow | blue, green         |
| Hsd17b10 | red    | green, blue         |
| Agps     | red    | green               |
| Nckap1   | red    | green               |
| Rrbp1    | red    | yellow, green, blue |
| Dync1i2  | blue   |                     |
| Xpo5     | red    | green               |
| Clasp2   | blue   | green               |
| Ywhaq    | red    |                     |
| Acaca    | red    | green               |
| Acly     | yellow |                     |

|         |      |                        |
|---------|------|------------------------|
| Actr1a  | blue | green                  |
| Slc25a4 | red  |                        |
| Ago2    | red  | cyan, green, blue, red |
| Ina     | red  | green, blue, cyan      |
| Rnpep   | red  |                        |
| Apob    | red  |                        |
| Aprt    | cyan |                        |
| Araf    | red  |                        |
| Arf5    | blue |                        |
| Arl1    | red  |                        |
| Atrx    | red  | green                  |
| Acadvl  | red  | green                  |
| Macf1   | red  | green                  |
| Lrrc47  | cyan |                        |
| Prdx1   | red  | green                  |
| Mylk    | red  | green                  |
| Gmps    | cyan |                        |
| Actb    | red  | green, blue, cyan      |
| Parp14  | red  |                        |
| Strap   | red  |                        |
| Wdr82   | red  | green                  |
| Cnot1   | red  | green, blue, cyan, red |
| Cbr1    | red  |                        |
| Ddx3x   | red  | blue, cyan, green      |
| Eprs    | cyan | blue                   |

|         |       |                        |
|---------|-------|------------------------|
| Bag6    | red   |                        |
| Mthfd1l | red   |                        |
| Chd4    | red   | green                  |
| C3      | red   |                        |
| Csk     | red   |                        |
| Cul1    | red   |                        |
| Cul3    | red   | green                  |
| Cul5    | red   |                        |
| Glyr1   | red   | green                  |
| Prdx6   | red   |                        |
| Hspd1   | cyan  |                        |
| Ctnnd1  | red   |                        |
| Dip2b   | red   |                        |
| Ddx6    | green | cyan, green, blue, red |
| Dld     | red   |                        |
| Dpp3    | red   |                        |
| Drg2    | red   |                        |
| Dnah5   | blue  | green                  |
| Nae1    | red   |                        |
| Xpo7    | red   |                        |
| Usp24   | red   |                        |
| Gcc2    | red   |                        |
| lars2   | cyan  |                        |
| Dock7   | red   |                        |
| Cul4b   | red   | blue                   |

|          |        |                           |
|----------|--------|---------------------------|
| Npepps   | red    |                           |
| Camk2d   | red    |                           |
| Itsn1    | red    |                           |
| Sec22b   | red    |                           |
| Luc7l2   | red    | blue                      |
| Farp1    | red    | green                     |
| Atp2b4   | red    |                           |
| Scamp3   | red    |                           |
| Cad      | red    |                           |
| Mars     | cyan   | green                     |
| Rab3gap2 | blue   |                           |
| Dhx9     | green  | blue, cyan, green, yellow |
| Sacs     | red    |                           |
| Hadha    | red    | green                     |
| Echs1    | red    |                           |
| Eef1g    | cyan   |                           |
| Eef2     | yellow | yellow, blue, reen        |
| Etf1     | yellow |                           |
| Gspt1    | yellow |                           |
| Hnrnpd   | green  | blue                      |
| Ube2m    | green  |                           |
| Cfl1     | red    | green                     |
| Ddx46    | green  | green                     |
| Rps15a   | yellow | yellow, green, blue       |
| Fasn     | red    |                           |

|         |        |             |
|---------|--------|-------------|
| Flnb    | red    | green       |
| Fxr2    | red    | green       |
| Hk1     | red    |             |
| Gps1    | red    |             |
| Qrich1  | red    |             |
| Sec23ip | red    |             |
| Supt16  | red    | green       |
| Mink1   | red    |             |
| Dnm2    | red    | green       |
| Sf3b1   | green  |             |
| Hnrnpl  | green  | blue, green |
| Gars    | cyan   |             |
| Gdi1    | red    |             |
| Gpc4    | red    |             |
| Cpsf6   | red    | cyan, green |
| Cct8    | yellow | green       |
| Hat1    | red    | green       |
| Hnrnpf  | green  | blue        |
| Larp7   | red    | blue        |
| Eif2s2  | yellow |             |
| Ilf2    | red    | green, blue |
| Ipo11   | red    | green       |
| Ipo7    | cyan   |             |
| Ckb     | red    |             |
| Kif5b   | blue   | green       |

|        |        |                        |
|--------|--------|------------------------|
| Mta1   | red    | green                  |
| Mecp2  | red    | green                  |
| Msn    | red    | green                  |
| Mt2    | red    |                        |
| Mta2   | red    | green                  |
| Mug1   | red    |                        |
| Myh9   | red    | green                  |
| Por    | red    |                        |
| Nsf    | red    |                        |
| rps14  | yellow | yellow, green, blue    |
| Pes1   | cyan   | green, blue            |
| Pgm1   | red    |                        |
| Phb    | red    |                        |
| Pls3   | red    | green                  |
| Prep   | red    |                        |
| Psma4  | green  | green, blue, cyan, red |
| Ptpn11 | red    |                        |
| Adsl   | cyan   |                        |
| Atic   | yellow |                        |
| Ssrp1  | red    | green                  |
| Uchl1  | red    |                        |
| Coro1c | red    | green                  |
| Pgm3   | red    |                        |
| Pelo   | yellow |                        |
| Eef1a1 | yellow | green                  |

|          |       |             |
|----------|-------|-------------|
| Clic1    | red   |             |
| Parp1    | red   | green       |
| Gdi2     | red   |             |
| Rtcb     | cyan  |             |
| Vps35    | red   |             |
| Ola1     | cyan  | green       |
| Pafah1b1 | blue  | green       |
| Tnpo1    | green |             |
| Map2k1   | red   | green       |
| G6pdx    | red   |             |
| Gnb1     | red   | green       |
| Ap1b1    | red   |             |
| Psm2     | green |             |
| Dnajb1   | red   | green       |
| Hspa4    | green | green       |
| Cct3     | cyan  | green       |
| Ugp2     | red   |             |
| Ppia     | red   |             |
| Mcm6     | red   |             |
| Ddost    | red   |             |
| Sptbn2   | blue  |             |
| Myh10    | red   | green, blue |
| Ugdh     | red   |             |
| Mcm3     | red   | green       |
| Stat3    | red   | green       |

|         |        |                           |
|---------|--------|---------------------------|
| Actn    | red    |                           |
| Tubb6   | blue   | green                     |
| Gna11   | red    |                           |
| Ruvbl2  | red    | green, blue               |
| Eif2b1  | red    |                           |
| Rpl30   | yellow | yellow, green, blue       |
| Wars    | cyan   |                           |
| Arpc2   | red    | green                     |
| Rpl21   | yellow | yellow, green, blue       |
| Rpl22   | yellow | yellow, green, blue       |
| Tuba1c  | blue   | green                     |
| Kpna2   | red    | cyan                      |
| Alb     | red    |                           |
| Ube2l3  | red    |                           |
| Psmc4   | green  |                           |
| Hnrnnp  | green  | blue                      |
| Rpl7a   | yellow | yellow, green, blue       |
| Rpl5    | yellow | yellow, green, blue       |
| Matr3   | red    |                           |
| Rps6    | yellow | cyan, yellow, green, blue |
| Rps16   | yellow | yellow, green, blue       |
| Ube3a   | red    |                           |
| Hnrnpa1 | green  | blue                      |
| Aldoa   | red    | green                     |
| Vim     | red    | green, blue               |

|          |        |                           |
|----------|--------|---------------------------|
| Rpl9     | yellow | yellow, green, blue       |
| Rpl28    | yellow | yellow, cyan, blue, green |
| Rps8     | yellow | yellow, green, blue       |
| Abcf1    | cyan   | yellow, blue, green       |
| Actr2    | red    | green                     |
| Ap2b1    | red    |                           |
| Prpsap2  | cyan   | yellow, green, blue       |
| Rpl10a   | yellow | yellow, green, blue       |
| Copa     | blue   |                           |
| Eif3a    | yellow | blue, green               |
| Ap2m1    | red    |                           |
| Eif3f    | yellow |                           |
| Abce1    | yellow |                           |
| Snx1     | red    |                           |
| Rcc1     | red    | green                     |
| Rpl17    | yellow | yellow, green, blue       |
| Aars     | cyan   |                           |
| Iqgap1   | red    | green, blue, cyan         |
| Hsp90ab1 | blue   |                           |
| Rangap1  | blue   | green                     |
| Prmt1    | red    |                           |
| Nup155   | red    |                           |
| Pdcd6ip  | red    | green                     |
| H2afy2   | red    | green                     |
| Nap111   | red    |                           |

|        |        |                        |
|--------|--------|------------------------|
| Vamp4  | red    |                        |
| Elavl1 | green  | green, cyan, blue      |
| Eif4a2 | yellow | green                  |
| Psmc2  | green  | red, green, blue, cyan |
| Kars   | cyan   |                        |
| Klc1   | blue   | green                  |
| Eif3b  | yellow |                        |
| Qars   | cyan   |                        |
| Abcd3  | red    |                        |
| Snx2   | blue   |                        |
| Ddb1   | red    |                        |
| Anxa6  | red    |                        |
| Tubb4b | blue   | green                  |
| Anxa2  | red    | green                  |
| Mtch2  | red    |                        |
| Arpc4  | red    | green                  |
| Dynll1 | blue   | green                  |
| Uqcrc1 | red    |                        |
| Rcc2   | blue   | green                  |
| Upf1   | yellow | cyan, red, blue, green |
| Rpl11  | yellow | yellow, green, blue    |
| Rpl32  | yellow | yellow, green, blue    |
| Rpl4   | yellow | yellow, green, blue    |
| Rpn1   | cyan   |                        |
| Rps11  | yellow | yellow, green, blue    |

|         |        |                     |
|---------|--------|---------------------|
| Rps17   | yellow | yellow, green, blue |
| Rps20   | yellow | yellow, green, blue |
| Rps27   | yellow | yellow, green, blue |
| Rps9    | yellow | yellow, green, blue |
| Xpnpep1 | red    |                     |
| Ank2    | blue   | green               |
| Sae1    | cyan   |                     |
| Sec31a  | green  |                     |
| Sdha    | red    | green               |
| Sfpq    | green  | green               |
| Snx27   | red    |                     |
| Ubr4    | red    | green               |
| Gls     | cyan   |                     |
| Gcn1    | red    | blue                |
